# Supplementary material for: Differential Exoproteome and Biochemical Characterisation of Neoparamoeba perurans
Source: MDPI journal article supplement (doi:10.3390/microorganisms9061258), 2021-06-09
Supplement: s1 [file s1]

**Differential exoproteome and biochemical characterisation  
of *Neoparamoeba perurans***

Kerrie Ní Dhufai<sup>a\*</sup>, Eugene Dillon<sup>b</sup>, Natasha Botwright<sup>c</sup>, Ian O'Connor<sup>a</sup>, Eugene MacCarthy<sup>a</sup>, Orla Slattery<sup>d</sup>

<sup>a</sup>Marine and Freshwater Research Centre, Galway-Mayo Institute of Technology, Co. Galway, Ireland

<sup>b</sup>Conway Institute, University College Dublin, Co. Dublin, Ireland

<sup>c</sup>CSIRO Agriculture and Food, Livestock & Aquaculture, Queensland Biosciences Precinct, 306 Carmody Road, Brisbane, Queensland 4067, Australia

<sup>d</sup>Department of Biopharmaceutical and Medical Science, Galway-Mayo Institute of Technology, Co. Galway, Ireland

\*Corresponding author. Marine and Freshwater Research Centre, Galway-Mayo Institute of Technology, Co. Galway, Ireland

Email: [kerrie.nidhufai@research.gmit.ie](mailto:kerrie.nidhufai@research.gmit.ie)

**Table S1:** Bacterial reference proteome downloaded on the 8<sup>th</sup> of May 2020 from UniProt

| <b>Proteome ID</b> | <b>Organism</b>                                                   | <b>Organism ID</b> | <b>Protein count</b> | <b>BUSCO</b>                                | <b>CPD</b>        | <b>Genome representation (RefSeq)</b> |
|--------------------|-------------------------------------------------------------------|--------------------|----------------------|---------------------------------------------|-------------------|---------------------------------------|
| UP000198862        | Pseudoalteromonas denitrificans DSM 6059 (Strain: DSM 6059)       | 1123010            | 5332                 | C:98.7%[S:98.2%,D:0.4%],F:0.4%,M:0.9%,n:452 | Close to Standard | full                                  |
| UP000033452        | Pseudoalteromonas rubra (Strain: S2471)                           | 43658              | 4390                 | C:98.7%[S:98.5%,D:0.2%],F:0%,M:1.3%,n:452   | Standard          | full                                  |
| UP000033511        | Pseudoalteromonas piscicida (Strain: S2040)                       | 43662              | 4134                 | C:97.1%[S:96.7%,D:0.4%],F:0.2%,M:2.7%,n:452 | Close to Standard | full                                  |
| UP000179786        | Pseudoalteromonas amylolytica (Strain: JW1)                       | 1859457            | 4015                 | C:99.3%[S:98.9%,D:0.4%],F:0.4%,M:0.2%,n:452 | Standard          | full                                  |
| UP000030341        | Pseudoalteromonas piratica (Strain: OCN003)                       | 1348114            | 3997                 | C:99.8%[S:99.3%,D:0.4%],F:0%,M:0.2%,n:452   | Standard          | full                                  |
| UP000033664        | Pseudoalteromonas ruthenica (Strain: S3137)                       | 151081             | 3470                 | C:98.5%[S:98%,D:0.4%],F:0.2%,M:1.3%,n:452   | Standard          | full                                  |
| UP000061457        | Pseudoalteromonas phenolica (Strain: KCTC 12086)                  | 161398             | 4164                 | C:98.9%[S:98.2%,D:0.7%],F:0.4%,M:0.7%,n:452 | Standard          | full                                  |
| UP000006843        | Pseudoalteromonas haloplanktis (strain TAC 125) (Strain: TAC 125) | 326442             | 3484                 | C:99.3%[S:98.9%,D:0.4%],F:0.2%,M:0.4%,n:452 | Standard          | full                                  |
| UP000016487        | Pseudoalteromonas citrea DSM 8771 (Strain: DSM 8771)              | 1117314            | 4457                 | C:99.6%[S:99.3%,D:0.2%],F:0.2%,M:0.2%,n:452 | Standard          | full                                  |
| UP000194841        | Pseudoalteromonas ulvae                                           | 107327             | 3964                 | C:99.3%[S:98.9%,D:0.4%],F:0%,M:0.7%,n:452   | Standard          | full                                  |
| UP000076643        | Pseudoalteromonas luteoviolacea DSM 6061 (Strain: DSM 6061)       | 1365250            | 5008                 | C:99.6%[S:98.9%,D:0.7%],F:0%,M:0.4%,n:452   | Standard          | full                                  |
| UP000007127        | Thalassospira xiamenensis M-5 = DSM 17429 (Strain: M-5)           | 1123366            | 4340                 | C:98.2%[S:98.2%,D:0%],F:0.5%,M:1.4%,n:221   | Standard          | full                                  |
| UP000252266        | Thalassospira xiamenensis (Strain: IB13)                          | 220697             | 4080                 | C:96.4%[S:96.4%,D:0%],F:0.9%,M:2.7%,n:221   | Standard          | full                                  |
| UP000253064        | Thalassospira xiamenensis (Strain: S27-11)                        | 220697             | 4028                 | C:97.3%[S:97.3%,D:0%],F:0.5%,M:2.3%,n:221   | Standard          | full                                  |

| <b>Proteome ID</b> | <b>Organism</b>                                                                                                  | <b>Organism ID</b> | <b>Protein count</b> | <b>BUSCO</b>                                | <b>CPD</b>        | <b>Genome representation (RefSeq)</b> |
|--------------------|------------------------------------------------------------------------------------------------------------------|--------------------|----------------------|---------------------------------------------|-------------------|---------------------------------------|
| UP000219068        | Thalassospira xiamenensis (Strain: USBA 78)                                                                      | 220697             | 5070                 | C:98.2%[S:95.9%,D:2.3%],F:0.5%,M:1.4%,n:221 | Outlier           | full                                  |
| UP000007463        | Fluviicola taffensis (strain DSM 16823 / NCIMB 13979 / RW262) (Strain: DSM 16823 / RW262 / RW262)                | 755732             | 4016                 | C:97.1%[S:96.6%,D:0.5%],F:1.6%,M:1.4%,n:443 | Close to Standard | full                                  |
| UP000000584        | Vibrio cholerae serotype O1 (strain ATCC 39315 / El Tor Inaba N16961) (Strain: ATCC 39315 / El Tor Inaba N16961) | 243277             | 3782                 | C:98.9%[S:98.5%,D:0.4%],F:0%,M:1.1%,n:452   | Standard          | full                                  |
| UP000000537        | Aliivibrio fischeri (strain ATCC 700601 / ES114) (Vibrio fischeri) (Strain: ATCC 700601 / ES114)                 | 312309             | 3813                 | C:99.3%[S:99.1%,D:0.2%],F:0.7%,M:0%,n:452   | Standard          | full                                  |
| UP000232179        | Vibrio sp. HA2012 (Strain: HA2012)                                                                               | 1971595            | 3382                 | C:99.8%[S:99.6%,D:0.2%],F:0%,M:0.2%,n:452   | Standard          | full                                  |
| UP000235640        | Vibrio sp. 10N.286.49.C2 (Strain: 10N.286.49.C2)                                                                 | 1880856            | 4338                 | C:99.8%[S:98.7%,D:1.1%],F:0%,M:0.2%,n:452   | Standard          | full                                  |
| UP000009100        | Vibrio tasmaniensis (strain LGP32) (Vibrio splendidus (strain Mel32)) (Strain: LGP32)                            | 575788             | 4420                 | C:99.1%[S:97.6%,D:1.5%],F:0.9%,M:0%,n:452   | Standard          | full                                  |
| UP000094165        | Vibrio genomosp. F6 str. FF-238 (Strain: FF-238)                                                                 | 1191298            | 3650                 | C:98.7%[S:98.5%,D:0.2%],F:0.4%,M:0.9%,n:452 | Standard          | full                                  |
| UP000094070        | Vibrio rumoiensis 1S-45 (Strain: 1S-45)                                                                          | 1188252            | 2981                 | C:99.1%[S:99.1%,D:0%],F:0%,M:0.9%,n:452     | Close to Standard | full                                  |
| UP000002943        | Vibrio caribbeanicus ATCC BAA-2122 (Strain: ATCC BAA-2122)                                                       | 796620             | 4023                 | C:99.3%[S:99.3%,D:0%],F:0.2%,M:0.4%,n:452   | Standard          | full                                  |
| UP000184608        | Vibrio aerogenes CECT 7868 (Strain: CECT 7868)                                                                   | 1216006            | 4565                 | C:99.3%[S:99.1%,D:0.2%],F:0.7%,M:0%,n:452   | Standard          | full                                  |
| UP000281112        | Vibrio sp. LJC006 (Strain: LJC006)                                                                               | 2487322            | 4277                 | C:100%[S:99.3%,D:0.7%],F:0%,M:0%,n:452      | Standard          | full                                  |
| UP000016567        | Vibrio azureus NBRC 104587 (Strain: NBRC 104587)                                                                 | 1219077            | 4147                 | C:99.6%[S:98.9%,D:0.7%],F:0.4%,M:0%,n:452   | Standard          | full                                  |
| UP000002493        | Vibrio parahaemolyticus serotype O3:K6 (strain RIMD 2210633) (Strain: RIMD 2210633)                              | 223926             | 4821                 | C:99.6%[S:98.7%,D:0.9%],F:0.2%,M:0.2%,n:452 | Standard          | full                                  |
| UP000193432        | Vibrio sp. qd031 (Strain: qd031)                                                                                 | 1603038            | 3553                 | C:98.5%[S:98%,D:0.4%],F:0%,M:1.5%,n:452     | Standard          | full                                  |

| <b>Proteome ID</b> | <b>Organism</b>                            | <b>Organism ID</b> | <b>Protein count</b> | <b>BUSCO</b>                                | <b>CPD</b> | <b>Genome representation (RefSeq)</b> |
|--------------------|--------------------------------------------|--------------------|----------------------|---------------------------------------------|------------|---------------------------------------|
| UP000269041        | Vibrio pectenicida (Strain: CAIM 594)      | 62763              | 3823                 | C:99.1%[S:94.7%,D:4.4%],F:0%,M:0.9%,n:452   | Standard   | full                                  |
| UP000037515        | Vibrio nereis (Strain: DSM 19584)          | 693                | 3660                 | C:100%[S:99.6%,D:0.4%],F:0%,M:0%,n:452      | Standard   | full                                  |
| UP000189475        | Vibrio palustris (Strain: CECT 9027)       | 1918946            | 3328                 | C:99.6%[S:98.2%,D:1.3%],F:0.2%,M:0.2%,n:452 | Standard   | full                                  |
| UP000029994        | Vibrio navarrensis (Strain: ATCC 51183)    | 29495              | 3643                 | C:99.8%[S:99.1%,D:0.7%],F:0%,M:0.2%,n:452   | Standard   | full                                  |
| UP000016895        | Vibrio nigripulchritudo (Strain: SnF1)     | 28173              | 5540                 | C:100%[S:99.8%,D:0.2%],F:0%,M:0%,n:452      | Standard   | full                                  |
| UP000003627        | Vibrio sp. (strain N418) (Strain: N418)    | 701176             | 4028                 | C:99.6%[S:98.2%,D:1.3%],F:0.4%,M:0%,n:452   | Standard   | full                                  |
| UP000198854        | Vibrio xiamenensis (Strain: CGMCC 1.10228) | 861298             | 4859                 | C:100%[S:98.9%,D:1.1%],F:0%,M:0%,n:452      | Standard   | full                                  |

**Table S2:** Amoebozoa reference proteome downloaded on the 8<sup>th</sup> of May 2020 from UniProt

| <b>Proteome ID</b> | <b>Organism</b>                                                                                                          | <b>Organism ID</b> | <b>Protein count</b> | <b>BUSCO</b>                                  | <b>CPD</b>        | <b>Genome representation (RefSeq)</b> |
|--------------------|--------------------------------------------------------------------------------------------------------------------------|--------------------|----------------------|-----------------------------------------------|-------------------|---------------------------------------|
| UP000001064        | Dictyostelium purpureum (Slime mold) (Strain: QSDP1)                                                                     | 5786               | 12347                | C:92.1%[S:89.1%,D:3%],F:2%,M:5.9%,n:303       | Standard          | full                                  |
| UP000002195        | Dictyostelium discoideum (Slime mold) (Strain: AX4)                                                                      | 44689              | 12746                | C:96%[S:92.4%,D:3.6%],F:0.7%,M:3.3%,n:303     | Standard          | full                                  |
| UP000001396        | Polysphondylium pallidum (strain ATCC 26659 / Pp 5 / PN500) (Heterostelium pallidum) (Strain: ATCC 26659 / Pp 5 / PN500) | 670386             | 12351                | C:92.1%[S:92.1%,D:0%],F:3.6%,M:4.3%,n:303     | Standard          | full                                  |
| UP000001926        | Entamoeba histolytica (Strain: ATCC 30459 / HM-1:IMSS)                                                                   | 5759               | 7959                 | C:65.7%[S:54.1%,D:11.6%],F:6.9%,M:27.4%,n:303 | Standard          | full                                  |
| UP000241769        | Planoprotostelium fungivorum (Strain: Jena)                                                                              | 1890364            | 16856                | C:94.4%[S:87.5%,D:6.9%],F:2%,M:3.6%,n:303     | Outlier           | full                                  |
| UP000014680        | Entamoeba invadens IP1 (Strain: IP1)                                                                                     | 370355             | 9857                 | C:53.8%[S:49.5%,D:4.3%],F:4.3%,M:41.9%,n:303  | Close to Standard | full                                  |
| UP000076078        | Tieghemostelium lacteum (Strain: TK)                                                                                     | 361077             | 10208                | C:93.4%[S:92.4%,D:1%],F:2.3%,M:4.3%,n:303     | Outlier           | full                                  |
| UP000011083        | Acanthamoeba castellanii str. Neff (Strain: Neff)                                                                        | 1257118            | 14939                | C:81.5%[S:77.6%,D:4%],F:5.9%,M:12.5%,n:303    | Close to Standard | full                                  |
| UP000007797        | Cavenderia fasciculata (strain SH3) (Slime mold) (Dictyostelium fasciculatum) (Strain: SH3)                              | 1054147            | 12152                | C:92.1%[S:90.4%,D:1.7%],F:2.3%,M:5.6%,n:303   | Standard          | full                                  |

**Table S3:** Paramoeba taxonomy search on UniProt KB downloaded on 8<sup>th</sup> of May 2020.

| <b>Organism</b>                 | <b>Total protein Count</b> | <b>Taxon ID</b> |
|---------------------------------|----------------------------|-----------------|
| Candidatus Syngnamydia salmonis | 9                          | 504270          |
| Paramoeba aestuarina            | 1                          | 180227          |
| Paramoeba aparasomata           | 39                         | 2583407         |
| Paramoeba branchiphila          | 1                          | 308475          |
| Paramoeba eilhardi              | 1                          | 200891          |
| Paramoeba invadens              | 1                          | 1321612         |
| Paramoeba karteshi              | 2                          | 2583406         |
| Paramoeba pemaquidensis         | 62                         | 180228          |
| Paramoeba perurans              | 2                          | 437603          |
| Perkinsela sp. CCAP 1560/4      | 4883                       | 1314962         |

**Table S4:** Identification of bacterial proteins from attenuated and virulent *Neoparamoeba perurans* exoproteomes characterised by a two-way Students *t*- test in Perseus. Statistically significant differential proteins are represented with a + sign based on q-value.

| Gene                  | Protein IDs            | Fasta headers                                                                    | Organism                                                                       | Mol. weight [kDa] | Fold change <sup>a</sup> | Att. Peptides <sup>b</sup> | Vir. Peptides <sup>b</sup> | T-test <sup>c</sup> |
|-----------------------|------------------------|----------------------------------------------------------------------------------|--------------------------------------------------------------------------------|-------------------|--------------------------|----------------------------|----------------------------|---------------------|
| ST37_14230            | A0A1X1MR06             | ABC transporter substrate-binding protein                                        | Vibrio sp. qd031                                                               | 47.26             | -3.18528                 | 6                          | 0                          | +                   |
| VS_0075               | B7VH98                 | Periplasmic dipeptide transport protein                                          | Vibrio tasmaniensis (strain LGP32)                                             | 57.321            | -5.41027                 | 22                         | 2                          | +                   |
| VS_2212; BCU70_21010  | B7VI06; A0A2N7D1D1     | Extracellular solute-binding protein, family 7; C4-dicarboxylate ABC transporter | Vibrio tasmaniensis (strain LGP32); Vibrio sp. 10N.286.49.C2                   | 36.945            | -5.87885                 | 19                         | 8                          | +                   |
| VS_II0220             | B7VQI9                 | Maltodextrin-binding protein                                                     | Vibrio tasmaniensis (strain LGP32)                                             | 42.386            | -4.90439                 | 13                         | 4                          | +                   |
| VS_0757; ushA         | B7VKH8; A0A0M0HJC5     | 5-nucleotidase                                                                   | Vibrio tasmaniensis (strain LGP32); Vibrio nereis                              | 62.392            | -0.414253                | 7                          | 9                          | +                   |
| PSHAa0782             | Q3IDX3                 | Flagellin                                                                        | Pseudoalteromonas haloplanktis (strain TAC 125)                                | 28.577            | -0.683505                | 13                         | 15                         | +                   |
| PP2015; BET10_08905   | A0A0S2JZH9; A0A1S1MTX5 | Flagellar hook protein FlgE                                                      | Pseudoalteromonas phenolica; Pseudoalteromonas amylolytica                     | 47.109            | -4.78254                 | 8                          | 6                          | +                   |
| BET10_13780; PSHAa059 | A0A1S1MX56; Q3ILL3     | Phosphate-binding protein ; Putative phosphate ABC transporter                   | Pseudoalteromonas amylolytica; Pseudoalteromonas haloplanktis (strain TAC 125) | 35.016            | -4.4918                  | 9                          | 0                          | +                   |
| VS_0355               | B7VIC7                 | Immunogenic protein                                                              | Vibrio tasmaniensis (strain LGP32)                                             | 34.436            | -5.20998                 | 11                         | 1                          | +                   |

| Gene                                 | Protein IDs               | Fasta headers                                                                                                                         | Organism                                                                                  | Mol. weight [kDa] | Fold change <sup>a</sup> | Att. Peptides <sup>b</sup> | Vir. Peptides <sup>b</sup> | T-test <sup>c</sup> |
|--------------------------------------|---------------------------|---------------------------------------------------------------------------------------------------------------------------------------|-------------------------------------------------------------------------------------------|-------------------|--------------------------|----------------------------|----------------------------|---------------------|
| VS_1055;<br>EA26_05975               | B7VM14                    | Lysine-arginine-ornithine-binding periplasmic protein; Nickel transporter                                                             | Vibrio tasmaniensis (strain LGP32); Vibrio navarrensis                                    | 28.109            | -6.24674                 | 11                         | 0                          | +                   |
| ahpCB                                | Q3IE21                    | Peroxiredoxin 2 (TSA) (PRP)                                                                                                           | Pseudoalteromonas haloplanktis (strain TAC 125)                                           | 22.115            | -4.75659                 | 9                          | 0                          | +                   |
| PSHAa2977;<br>B1199_19990            | Q3IK06;<br>A0A244CKW5     | Secreted alkaline phosphatase; Alkaline phosphatase                                                                                   | Pseudoalteromonas haloplanktis (strain TAC 125); Pseudoalteromonas ulvae                  | 56.104            | -4.1791                  | 10                         | 2                          | +                   |
| glnA; glnA                           | A0A0A7EBM5;<br>U1KVQ6     | Glutamine synthetase                                                                                                                  | Pseudoalteromonas piratica; Pseudoalteromonas citrea DSM 8771                             | 51.771            | -3.10513                 | 5                          | 0                          | +                   |
| PP2015_904                           | A0A0S2K074                | Flagellin                                                                                                                             | Pseudoalteromonas phenolica                                                               | 33.272            | -1.98111                 | 8                          | 6                          | +                   |
| A6E14_15830;<br>aapJ                 | A0A1B9QUY2;<br>A0A2N8ZA18 | Amino acid ABC transporter substrate-binding protein; Amino-acid transporter subunit periplasmic-binding component of ABC superfamily | Vibrio genomosp. F10; Vibrio tapetis subsp. tapetis                                       | 36.779            | -4.40352                 | 9                          | 3                          | +                   |
| PSHAa1824;<br>SAMN0274572<br>4_03050 | Q3IHE8;<br>A0A1I1NQX5     | Putative ferric enterobactin receptor; Iron complex outer membrane receptor protein                                                   | Pseudoalteromonas haloplanktis (strain TAC 125); Pseudoalteromonas denitrificans DSM 6059 | 108.47            | -0.134083                | 1                          | 6                          | -                   |
| BCU70_12530;<br>JCM19236_807         | A0A2N7D8W8;<br>A0A0B8PY06 | Oligopeptide ABC transporter substrate-binding protein OppA; Oligopeptide ABC transporter                                             | Vibrio sp. 10N.286.49.C2; Vibrio sp. JCM 19236                                            | 60.845            | -4.28191                 | 5                          | 0                          | +                   |



| Gene                               | Protein IDs               | Fasta headers                                                                                              | Organism                                                                           | Mol. weight [kDa] | Fold change <sup>a</sup> | Att. Peptides <sup>b</sup> | Vir. Peptides <sup>b</sup> | T-test <sup>c</sup> |
|------------------------------------|---------------------------|------------------------------------------------------------------------------------------------------------|------------------------------------------------------------------------------------|-------------------|--------------------------|----------------------------|----------------------------|---------------------|
| VS_0814;<br>JCM19238_463<br>3      | B7VKN2;<br>A0A090P9S5     | Flagellin                                                                                                  | Vibrio tasmaniensis (strain LGP32); Vibrio ponticus                                | 41.306            | 2.93242                  | 0                          | 6                          | +                   |
| PSHAa0108                          | Q3IDJ5                    | Putative TonB-dependent receptor putative outer membrane bound protein involved in iron chelated transport | Pseudoalteromonas haloplanktis (strain TAC 125)                                    | 77.154            | -0.386178                | 0                          | 6                          | +                   |
| PSHAa0695                          | Q3IFM9                    | Putative outer membrane receptor for ferric iron uptake putative TonB-dependent receptor                   | Pseudoalteromonas haloplanktis (strain TAC 125)                                    | 78.238            | -1.66131                 | 0                          | 5                          | +                   |
| rp1L; rp1L                         | Q3ILQ0;<br>U1KUY2         | 50S ribosomal protein L7/L12                                                                               | Pseudoalteromonas haloplanktis (strain TAC 125); Pseudoalteromonas citrea DSM 8771 | 12.23             | -1.66069                 | 6                          | 5                          | +                   |
| PCIT_22080                         | U1KK96                    | Peptidase S8/S53 subtilisin kexin sedolisin                                                                | Pseudoalteromonas citrea DSM 8771                                                  | 127.37            | -3.70559                 | 6                          | 3                          | +                   |
| AKJ17_10950<br>;VTAP4600_B0<br>650 | A0A0M0HMY3;<br>A0A2N8ZK26 | Maltoporin                                                                                                 | Vibrio nereis; Vibrio tapetis subsp. tapetis                                       | 50.515            | -0.600403                | 0                          | 6                          | -                   |
| VS_II0677                          | B7VRS9                    | Ferrichrome-iron receptor                                                                                  | Vibrio tasmaniensis (strain LGP32)                                                 | 78.505            | -0.834848                | 0                          | 5                          | -                   |
| fliC                               | Q3IDX4                    | Flagellin                                                                                                  | Pseudoalteromonas haloplanktis (strain TAC 125)                                    | 28.504            | 0.124568                 | 1                          | 3                          | -                   |
| VPA0179;<br>EA26_13395             | Q87JR9;A0A099<br>LYB7     | Uncharacterized protein ; dTDP-glucose 4,6-dehydratase                                                     | Vibrio parahaemolyticus serotype O3:K6 (strain RIMD 2210633); Vibrio navarrensis   | 73.415            | -3.83314                 | 3                          | 0                          | +                   |

| Gene | Protein IDs | Fasta headers                     | Organism                          | Mol. weight [kDa] | Fold change <sup>a</sup> | Att. Peptides <sup>b</sup> | Vir. Peptides <sup>b</sup> | T-test <sup>c</sup> |
|------|-------------|-----------------------------------|-----------------------------------|-------------------|--------------------------|----------------------------|----------------------------|---------------------|
| gcvH | B7VSK2      | Glycine cleavage system H protein | Vibrio tasmaniensis (strain LGP32 | 13.88             | -4.08161                 | 3                          | 0                          | +                   |

<sup>a</sup> Fold change of virulent proteins related to attenuated proteins; <sup>b</sup> Razor and unique peptide counts; <sup>c</sup> Students t- test significance
